# Supplementary material for: The investigation of June 21 and 25, 2015 CMEs using EUHFORIA
Source: Copernicus journal article supplement (doi:10.5194/egusphere-2024-1921), 2024-07-04
Supplement: Supplementary file [file egusphere-2024-1921-AC2-supplement.zip]

## FFShock June 21, 2015, 16:44:30 UT, OMNI

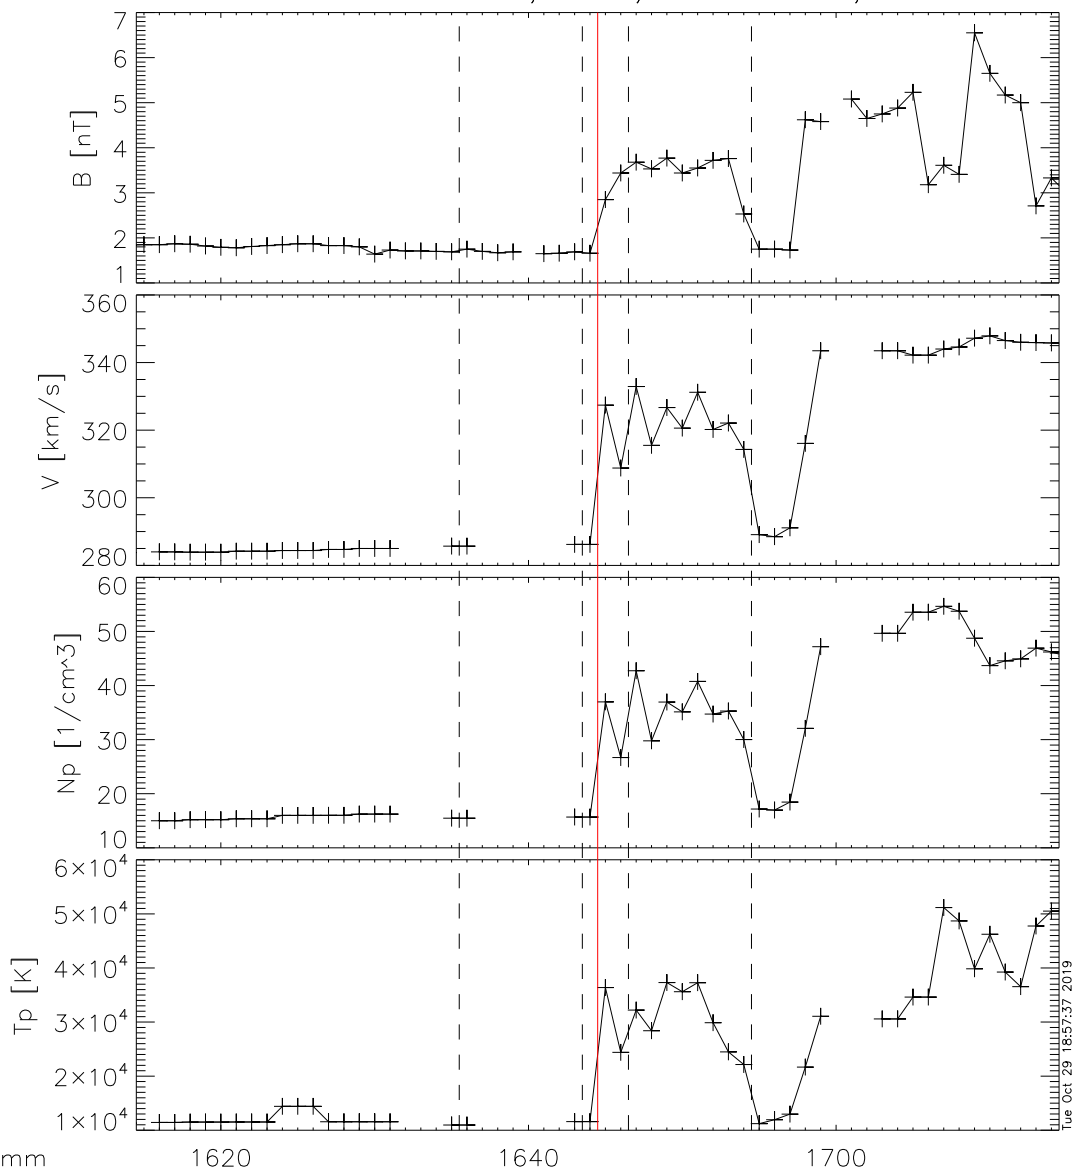

Tue Oct 29 18:57:37 2019

hhmm  
2015 Jun 21
