# Supplementary material for: The investigation of June 21 and 25, 2015 CMEs using EUHFORIA
Source: Copernicus journal article supplement (doi:10.5194/egusphere-2024-1921), 2024-07-04

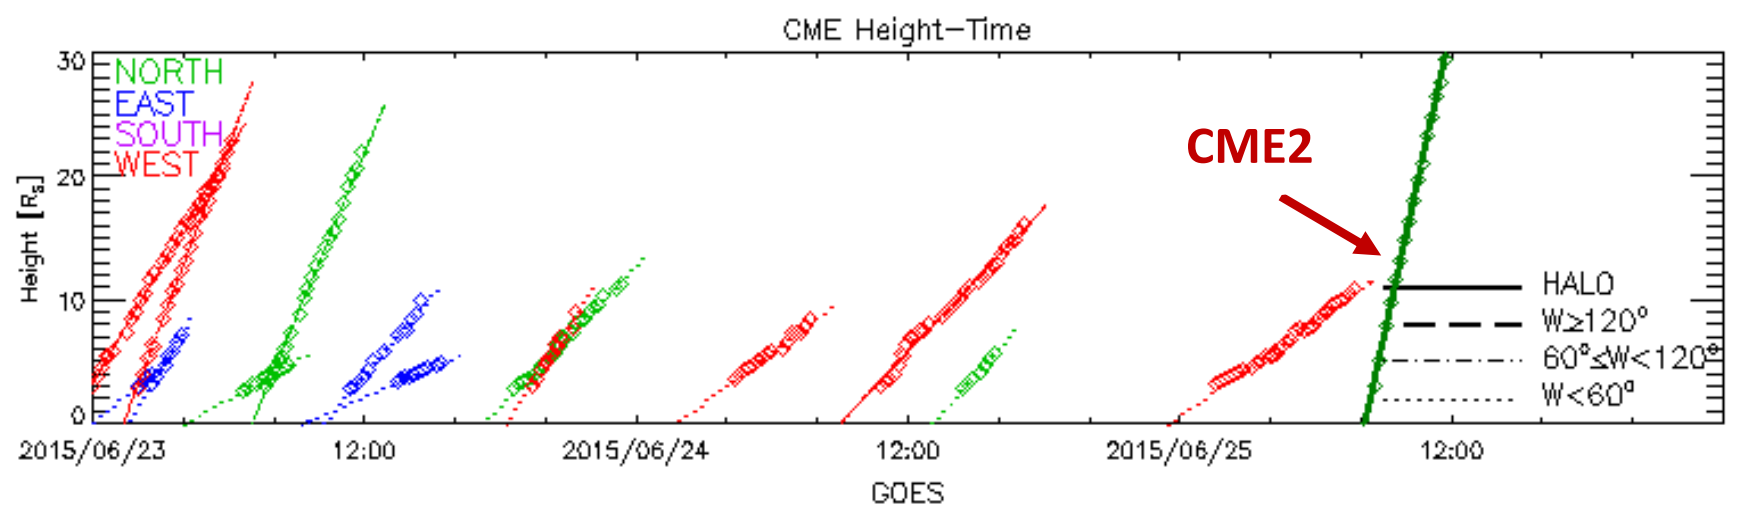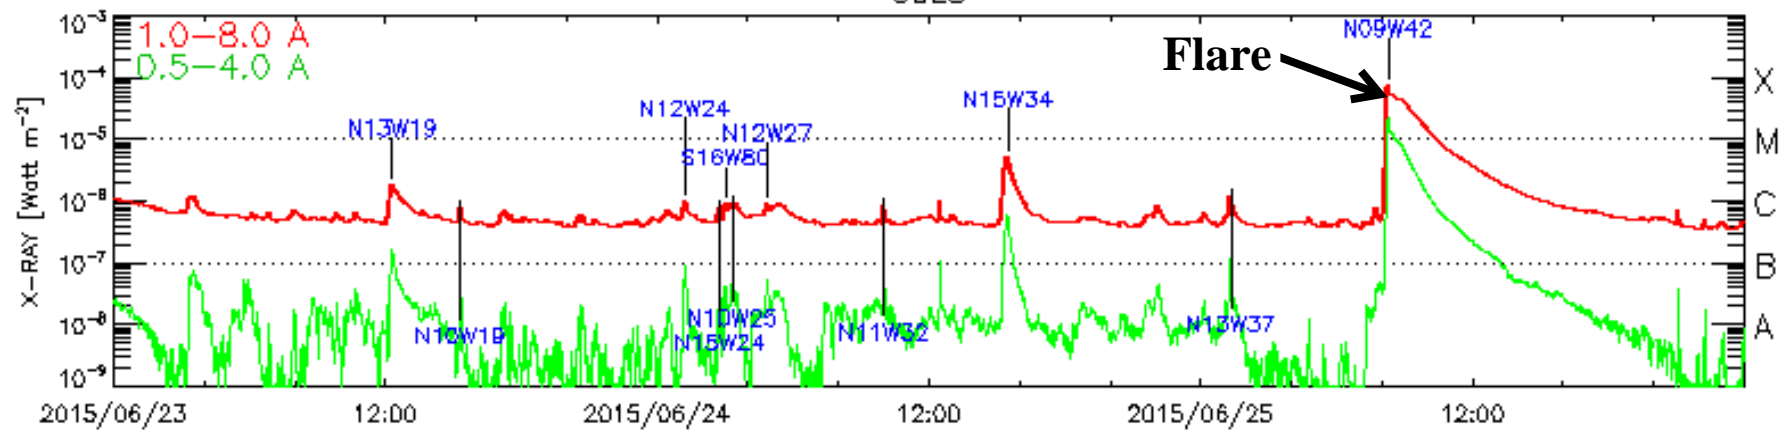

Supplement: Supplementary file [file egusphere-2024-1921-AC2-supplement.zip]
